# Supplementary material
Source: HighWire-hosted journal article supplement (https://www.annfammed.org/content/suppl/2019/09/06/17.5.396)
Supplement: Sidorkiewicz_Supp_Apps.pdf [file Sidorkiewicz_Supp_Apps.pdf]

## **Supplemental materials for**

Sidorkiewicz S, Malmartel A, Prevost L, et al. Patient-physician agreement in reporting and prioritizing existing chronic conditions. *Ann Fam Med*. 2019;17(5):396-402.

### **Supplementary Appendix**

**Supplementary Appendix, Figure 1.** Procedure for developing the list of chronic conditions

**Supplementary Appendix, Table 1.** List of the 124 chronic conditions

**Supplementary Appendix, Table 2.** General practitioner (GP) characteristics (n=16)

**Supplementary Appendix, Table 3.** Agreement between patient self-reports and GP reports of patients' chronic conditions for all chronic conditions (n=233 patient–GP pairs)

**Supplementary Appendix, Table 4.** Agreement between patients and GPs on health priorities (n=153 patient–GP pairs)

**Supplementary Appendix, Figure 1.** Procedure for developing a list of chronic conditions

Preliminary step

Exclusion of inappropriate items (independently by two researchers)

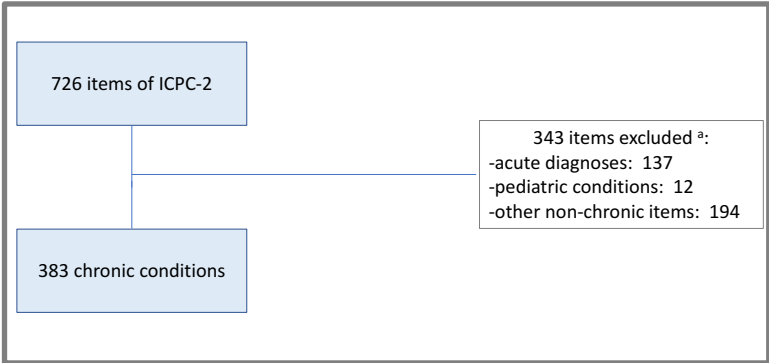

Delphi Process

1<sup>st</sup> round with 12 experts  
2<sup>nd</sup> round with 11 experts

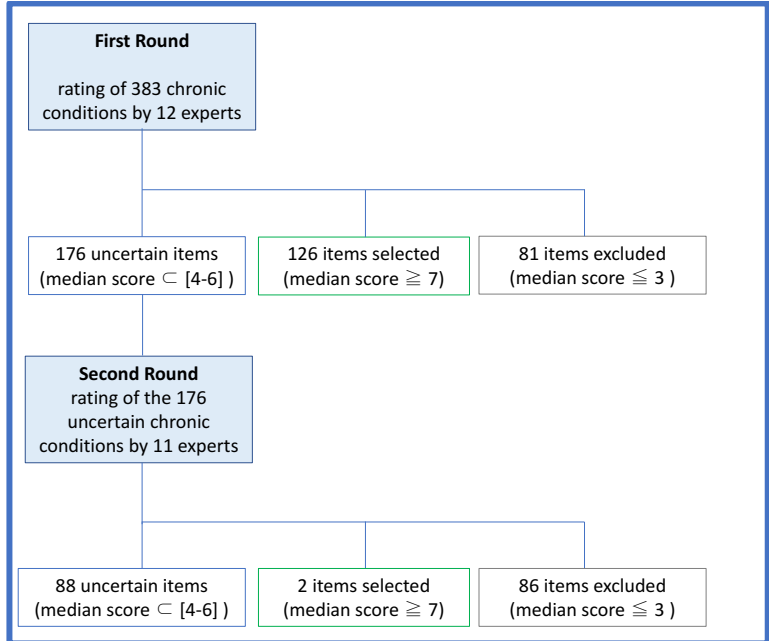

Panel Meeting

Meeting of the 10 experts

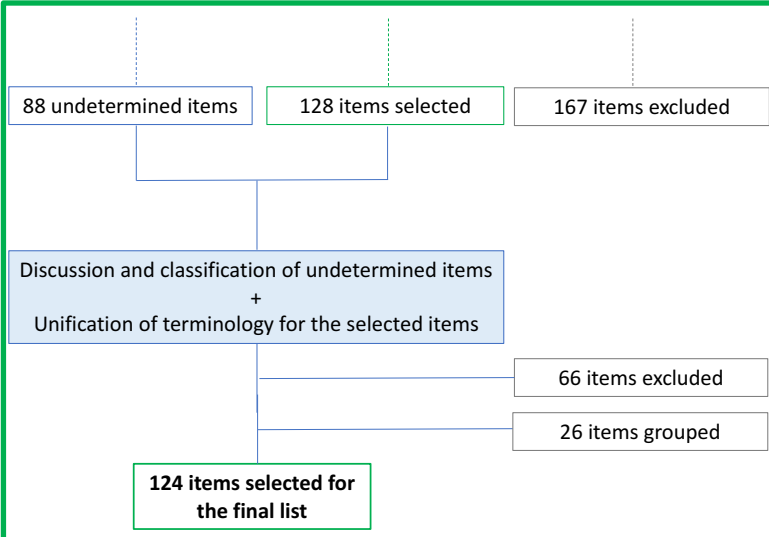

<sup>a</sup> examples of items excluded: *acute otitis media* (acute diagnoses), *blocked lachrymal duct in infant* (pediatric condition), *physical function test* (other non-chronic item)

## Supplementary Appendix, Table 1. List of the 124 chronic conditions

|                                                          |                                                         |
|----------------------------------------------------------|---------------------------------------------------------|
| <b>Cardiology (n=11)</b>                                 |                                                         |
| - high blood pressure                                    | - coronary artery disease                               |
| - cardiac arrhythmia                                     | - stroke/transient ischaemic attack                     |
| - pulmonary artery hypertension                          | - cardiovascular cancer                                 |
| - peripheral artery disease                              | - valvular heart disease                                |
| - current pulmonary embolism                             | - other cardiovascular disease                          |
| - congenital cardiovascular disease                      |                                                         |
| <b>Endocrinology (n=10)</b>                              |                                                         |
| - type 1 diabetes mellitus                               | - hyperthyroidism                                       |
| - type 2 diabetes mellitus                               | - hypothyroidism                                        |
| - dyslipidaemia                                          | - benign thyroid neoplasm                               |
| - obesity                                                | - thyroid cancer                                        |
| - recurrent gout                                         | - other endocrine disease                               |
| <b>Respiratory (n=6)</b>                                 |                                                         |
| - chronic obstructive pulmonary disease                  | - upper airways cancer                                  |
| - asthma                                                 | - congenital respiratory disease (cystic fibrosis etc.) |
| - pulmonary cancer                                       | - other respiratory disease                             |
| <b>Abdominal (n=10)</b>                                  |                                                         |
| - hiatus hernia/oesophagitis/chronic gastritis           | - hemochromatosis                                       |
| - irritable bowel syndrome                               | - digestive tract cancers                               |
| - diverticular disease                                   | - faecal incontinence                                   |
| - viral hepatitis                                        | - liver disease with cirrhosis                          |
| - inflammatory bowel disease                             | - other digestive disease                               |
| <b>Musculoskeletal system (n=8)</b>                      |                                                         |
| - chronic low back pain (with or without radiating pain) | - inflammatory arthritis                                |
| - arthritis                                              | - osteoporosis                                          |
| - scoliosis/acquired deformity of spine                  | - musculoskeletal cancer                                |
| - shoulder syndrome                                      | - other musculoskeletal disease                         |
| <b>Dermatology (n=8)</b>                                 |                                                         |
| - eczema                                                 | - herpes chronic infection                              |
| - acne                                                   | - skin cancer                                           |
| - psoriasis                                              | - seborrheic dermatitis                                 |
| - chronic ulcer skin                                     | - other dermatologic disease                            |
| <b>Ophthalmology and otorhinolaryngology (n=11)</b>      |                                                         |
| - retinopathy                                            | - presbycusis/deafness                                  |
| - visual impairment/blindness                            | - vertiginous syndrome                                  |
| - glaucoma                                               | - chronic otitis media                                  |
| - cataract                                               | - cancer of ears or eyes                                |
| - macular degeneration                                   | - (allergic) chronic rhinitis/sinusitis                 |
| - other ear-nose-throat or ophthalmologic disease        |                                                         |

#### Neurology (n=13)

---

- epilepsy
- peripheral neuropathy
- tunnel syndrome
- multiple sclerosis
- Parkinson disease
- migraine/cluster headache/facial neuralgia
- limb paralysis (except stroke)
- facial paralysis (except stroke)
- restless legs
- speech disorder
- post-poliomyelitis sequelae
- cancer of the nervous system
- other neurologic disease

#### Immunology and haematology (n=8)

---

- leukemia/blood cancer
- lymphoma
- inherited haemolytic anaemia
- Biermer anaemia
- haemophilia/thrombophilia
- HIV infection/AIDS
- autoimmune connective tissue disorder/vasculitis
- other hematologic/immunologic disease

#### Psychiatry (n=16)

---

- alcohol use disorder
- medication/drug abuse
- post-traumatic stress disorder
- schizophrenia
- bipolar disorder
- other psychosis
- sleep disorder
- memory disturbance/dementia
- tobacco use
- depressive disorder
- chronic anxiety disorder
- personality disorder
- somatization disorder
- mental retardation
- anorexia nervosa/bulimia
- other psychiatric disease

#### Urology (n=11)

---

- benign prostatic hypertrophy
- incontinence urine
- prostate cancer
- chronic urinary calculus
- chronic sexual function disorder
- chronic renal failure
- urinary tract cancer
- other genital cancer
- male infertility
- congenital anomaly of urinary tract
- other urologic disease

#### Gynaecology(n=8)

---

- menopausal symptoms with treatment
- uterine fibroids
- female infertility
- ureterovaginal prolapsed
- cervical cancer
- breast cancer
- other gynaecologic cancer
- other gynaecologic disease

#### Other (n=4)

- tuberculosis
- chronic pain syndrome
- other cancer
- other disease

**Supplementary Appendix, Table 2.** General practitioner (GP) characteristics (n=16)

| <b>GPs included in the study<br/>(n= 16)</b>       |                 |
|----------------------------------------------------|-----------------|
| <b>Characteristics</b>                             | <b>Value</b>    |
| <b>Age – median (IQR), years</b>                   | 57.5 [33.8-64]  |
| <b>Female sex – n (%)</b>                          | 5 (31.3)        |
| <b>Years of practice – median (IQR), years</b>     | 28 [4.8-30.3]   |
| <b>Urban setting – n (%)</b>                       | 16 (100)        |
| <b>Type of practice – n (%)</b>                    |                 |
| 1 GP working in practice                           | 3 (18.8)        |
| ≥2 GPs working in practice                         | 13 (81.2)       |
| <b>Teaching GP – n (%)</b>                         | 15 (93.8)       |
| <b>Duration of consultations, min – n (%)</b>      |                 |
| 15-20                                              | 7 (43.8)        |
| 21-25                                              | 5 (31.2)        |
| 26-30                                              | 3 (18.8)        |
| >30                                                | 1 (6.2)         |
| <b>Number of patients recruited – median (IQR)</b> | 17.0 [8.0-19.0] |

Abbreviations: IQR: interquartile range

| <i>French national cohort of GPs in 2017<br/>(n=102250)</i> |                     |
|-------------------------------------------------------------|---------------------|
| <i>Characteristics</i>                                      | <i>Value</i>        |
| <i>Age– mean, years</i>                                     | <i>51.4</i>         |
| <i>Female sex– n (%)</i>                                    | <i>46434 (45.4)</i> |

**Supplementary Appendix, Table 3.** Agreement between patient self-reports and GP reports of patients' chronic conditions for all chronic conditions (n=233 patient-GP pairs)

| Chronic condition <sup>a</sup> | Patient self-report | GP report | Patient/GP agreement table <sup>b</sup> |          | Agreement statistic |
|--------------------------------|---------------------|-----------|-----------------------------------------|----------|---------------------|
|                                | n (%)               | n (%)     | [P-/GP-]                                | [P-/GP+] | Kappa (95% CI)      |
|                                |                     |           | [P+/GP-]                                | [P+/GP+] |                     |

| Cardiovascular chronic conditions                        |                  |                  |            |           |                         |
|----------------------------------------------------------|------------------|------------------|------------|-----------|-------------------------|
| <b>High blood pressure</b>                               | <b>80 (34.3)</b> | <b>90 (38.6)</b> | <b>134</b> | <b>19</b> | <b>0.74 (0.64-0.85)</b> |
|                                                          |                  |                  | <b>9</b>   | <b>71</b> |                         |
| Cardiac arrhythmia                                       | 8 (3.4)          | 13 (5.6)         | 218        | 7         | <sup>c</sup>            |
|                                                          |                  |                  | 2          | 6         |                         |
| Stroke / transient cerebral ischaemia                    | 8 (3.4)          | 7 (3.0)          | 225        | 0         | <sup>c</sup>            |
|                                                          |                  |                  | 1          | 7         |                         |
| Ischaemic heart disease / angina / myocardial infarction | 7 (3.0)          | 16 (6.9)         | 217        | 9         | <sup>c</sup>            |
|                                                          |                  |                  | 0          | 7         |                         |
| Congenital anomaly cardiovascular                        | 4 (1.7)          | 1 (0.4)          | 229        | 0         | <sup>c</sup>            |
|                                                          |                  |                  | 3          | 1         |                         |
| Heart valve disease                                      | 1 (0.4)          | 10 (4.3)         | 223        | 9         | <sup>c</sup>            |
|                                                          |                  |                  | 0          | 1         |                         |
| Atherosclerosis / peripheral arterial disease            | 2 (0.9)          | 1 (0.4)          | 231        | 0         | <sup>c</sup>            |
|                                                          |                  |                  | 1          | 1         |                         |
| Pulmonary embolism                                       | 1 (0.4)          | 2 (0.9)          | 231        | 1         | <sup>c</sup>            |
|                                                          |                  |                  | 0          | 1         |                         |
| Pulmonary hypertension                                   | 0 (0.0)          | 1 (0.4)          | 232        | 1         | <sup>c</sup>            |
|                                                          |                  |                  | 0          | 0         |                         |

| Endocrine / metabolic and Nutritional chronic conditions |          |           |     |    |                   |
|----------------------------------------------------------|----------|-----------|-----|----|-------------------|
| Hypothyroidism                                           | 18 (7.7) | 19 (8.2)  | 212 | 3  | 0.85 (0.73-0.96)  |
|                                                          |          |           | 2   | 16 |                   |
| Obesity                                                  | 15 (6.4) | 18 (7.7)  | 208 | 10 | 0.45 (0.18-0.63)  |
|                                                          |          |           | 7   | 8  |                   |
| Diabetes mellitus (type 2)                               | 14 (6.0) | 22 (9.4)  | 210 | 9  | 0.70 (0.51-0.84)  |
|                                                          |          |           | 1   | 13 |                   |
| Diabetes mellitus (type 1)                               | 10 (4.3) | 4 (1.7)   | 221 | 2  | 0.27 (-0.02-0.56) |
|                                                          |          |           | 8   | 2  |                   |
| Hyperthyroidism                                          | 6 (2.6)  | 4 (1.7)   | 227 | 0  | <sup>c</sup>      |
|                                                          |          |           | 2   | 4  |                   |
| Dyslipidaemia                                            | 5 (2.1)  | 39 (16.7) | 192 | 36 | <sup>c</sup>      |
|                                                          |          |           | 2   | 3  |                   |
| Benign neoplasm thyroid                                  | 4 (1.7)  | 5 (2.1)   | 227 | 2  | <sup>c</sup>      |
|                                                          |          |           | 1   | 3  |                   |
| Gout                                                     | 0 (0.0)  | 1 (0.4)   | 232 | 1  | <sup>c</sup>      |
|                                                          |          |           | 0   | 0  |                   |
| Thyroid cancer                                           | 1 (0.4)  | 0 (0.0)   | 232 | 0  | <sup>c</sup>      |
|                                                          |          |           | 1   | 0  |                   |

| Respiratory chronic conditions        |                  |                 |            |           |                         |
|---------------------------------------|------------------|-----------------|------------|-----------|-------------------------|
| <b>Asthma</b>                         | <b>24 (10.3)</b> | <b>18 (7.8)</b> | <b>203</b> | <b>6</b>  | <b>0.53 (0.35-0.71)</b> |
|                                       |                  |                 | <b>12</b>  | <b>12</b> |                         |
| Chronic obstructive pulmonary disease | 8 (3.4)          | 14 (6.0)        | 216        | 9         | <sup>c</sup>            |
|                                       |                  |                 | 3          | 5         |                         |
| Lung cancer                           | 1 (0.4)          | 1 (0.4)         | 232        | 0         | <sup>c</sup>            |
|                                       |                  |                 | 0          | 1         |                         |

| Digestive chronic conditions                                        |           |           |     |    |                  |
|---------------------------------------------------------------------|-----------|-----------|-----|----|------------------|
| Hiatus hernia / gastroesophageal reflux disease / chronic gastritis | 31 (13.3) | 32 (13.7) | 186 | 16 | 0.43 (0.29-0.53) |
|                                                                     |           |           | 15  | 16 |                  |
| Irritable bowel syndrome                                            | 18 (7.7)  | 10 (4.3)  | 212 | 3  | 0.47 (0.21-0.68) |
|                                                                     |           |           | 11  | 7  |                  |
| Viral hepatitis                                                     | 6 (2.6)   | 8 (3.4)   | 224 | 3  | c                |
|                                                                     |           |           | 1   | 5  |                  |
| Digestive tract cancer                                              | 3 (1.3)   | 4 (1.7)   | 230 | 0  | c                |
|                                                                     |           |           | 1   | 2  |                  |
| Inflammatory bowel disease                                          | 2 (0.9)   | 2 (0.9)   | 231 | 0  | c                |
|                                                                     |           |           | 0   | 2  |                  |
| Diverticular disease                                                | 2 (0.9)   | 3 (1.3)   | 229 | 2  | c                |
|                                                                     |           |           | 1   | 1  |                  |
| Liver disease with cirrhosis                                        | 0 (0.0)   | 1 (0.4)   | 232 | 1  | c                |
|                                                                     |           |           | 0   | 0  |                  |

| Musculoskeletal chronic conditions     |           |           |     |    |                  |
|----------------------------------------|-----------|-----------|-----|----|------------------|
| Osteoarthritis                         | 59 (25.3) | 42 (18.0) | 157 | 17 | 0.36 (0.25-0.46) |
|                                        |           |           | 34  | 25 |                  |
| Chronic low back pain                  | 32 (13.7) | 29 (12.4) | 183 | 18 | 0.26 (0.03-0.42) |
|                                        |           |           | 21  | 11 |                  |
| Scoliosis and other acquired deformity | 16 (6.9)  | 6 (2.6)   | 215 | 2  | 0.32 (0.12-0.53) |
|                                        |           |           | 12  | 4  |                  |
| Shoulder syndrome                      | 15 (6.4)  | 7 (3.0)   | 214 | 4  | 0.24 (0.00-0.43) |
|                                        |           |           | 12  | 3  |                  |
| Osteoporosis                           | 12 (5.2)  | 13 (5.6)  | 212 | 9  | 0.28 (0.07-0.49) |
|                                        |           |           | 8   | 4  |                  |
| Inflammatory arthritis                 | 9 (3.9)   | 2 (0.9)   | 224 | 0  | c                |
|                                        |           |           | 7   | 2  |                  |

| Skin chronic conditions  |          |         |     |   |                  |
|--------------------------|----------|---------|-----|---|------------------|
| Eczema                   | 21 (9.0) | 7 (3.0) | 209 | 3 | 0.25 (0.05-0.40) |
|                          |          |         | 17  | 4 |                  |
| Herpes chronic infection | 17 (7.3) | 3 (1.3) | 216 | 0 | 0.28 (0.00-0.57) |
|                          |          |         | 14  | 3 |                  |
| Psoriasis                | 9 (3.9)  | 6 (2.6) | 221 | 3 | c                |
|                          |          |         | 6   | 3 |                  |
| Seborrheic dermatitis    | 8 (3.4)  | 2 (0.9) | 225 | 0 | c                |
|                          |          |         | 6   | 2 |                  |
| Acne                     | 5 (2.1)  | 1 (0.4) | 228 | 0 | c                |
|                          |          |         | 4   | 1 |                  |
| Skin cancer              | 2 (0.9)  | 5 (2.1) | 227 | 4 | c                |
|                          |          |         | 1   | 1 |                  |
| Chronic ulcer skin       | 1 (0.4)  | 0 (0.0) | 232 | 0 | c                |
|                          |          |         | 1   | 0 |                  |

| Ophthalmologic and ear chronic conditions |           |          |     |   |                  |
|-------------------------------------------|-----------|----------|-----|---|------------------|
| Hearing impairment / presbycusis          | 27 (11.6) | 7 (3.0)  | 205 | 1 | 0.32 (0.03-0.56) |
|                                           |           |          | 21  | 6 |                  |
| Chronic rhinitis and/or sinusitis         | 25 (10.7) | 17 (7.3) | 200 | 8 | 0.37 (0.23-0.51) |
|                                           |           |          | 16  | 9 |                  |
| Cataract                                  | 16 (6.9)  | 3 (1.3)  | 214 | 3 | c                |
|                                           |           |          | 16  | 0 |                  |
| Vertiginous syndrome                      | 7 (3.0)   | 2 (0.9)  | 225 | 1 | c                |
|                                           |           |          | 6   | 1 |                  |
| Macular degeneration                      | 6 (2.6)   | 0 (0.0)  | 227 | 0 | c                |
|                                           |           |          | 6   | 0 |                  |
|                                           | 5 (2.1)   | 4 (1.7)  | 227 | 1 | c                |

|                               |         |         |     |   |   |
|-------------------------------|---------|---------|-----|---|---|
| Glaucoma                      |         |         | 2   | 3 |   |
| Blindness / visual impairment | 2 (0.9) | 1 (0.4) | 231 | 0 | c |
|                               |         |         | 1   | 1 |   |
| Chronic otitis media          | 2 (0.9) | 1 (0.4) | 231 | 0 | c |
|                               |         |         | 1   | 1 |   |
| Retinopathy                   | 0 (0.0) | 1 (0.4) | 232 | 1 | c |
|                               |         |         | 0   | 0 |   |

| Neurological chronic conditions               |          |          |     |   |                  |
|-----------------------------------------------|----------|----------|-----|---|------------------|
| Migraine / cluster headache                   | 17 (7.3) | 16 (6.9) | 208 | 8 | 0.45 (0.19-0.62) |
|                                               |          |          | 9   | 8 |                  |
| Carpal tunnel syndrome / other canal syndrome | 7 (3.0)  | 2 (0.9)  | 224 | 2 | c                |
|                                               |          |          | 6   | 1 |                  |
| Epilepsy                                      | 5 (2.1)  | 4 (1.7)  | 227 | 1 | c                |
|                                               |          |          | 2   | 3 |                  |
| Restless legs                                 | 4 (1.7)  | 0 (0.0)  | 229 | 0 | c                |
|                                               |          |          | 4   | 0 |                  |
| Peripheral neuritis / neuropathy              | 2 (0.9)  | 7 (3.0)  | 226 | 5 | c                |
|                                               |          |          | 0   | 2 |                  |
| Multiple sclerosis                            | 1 (0.4)  | 1 (0.4)  | 232 | 0 | c                |
|                                               |          |          | 0   | 1 |                  |
| Post-poliomyelitis sequelae                   | 1 (0.4)  | 1 (0.4)  | 232 | 0 | c                |
|                                               |          |          | 0   | 1 |                  |
| Limb paralysis (except stroke)                | 0 (0.0)  | 1 (0.4)  | 232 | 1 | c                |
|                                               |          |          | 0   | 0 |                  |
| Facial paralysis (except stroke)              | 1 (0.4)  | 1 (0.4)  | 232 | 0 | c                |
|                                               |          |          | 0   | 1 |                  |
| (Non-facial) paralysis                        | 0 (0.0)  | 1 (0.4)  | 232 | 1 | c                |
|                                               |          |          | 0   | 0 |                  |

| Blood / Immune mechanism chronic conditions        |         |         |     |   |   |
|----------------------------------------------------|---------|---------|-----|---|---|
| HIV infection / AIDS                               | 4 (1.7) | 3 (1.3) | 229 | 0 | c |
|                                                    |         |         | 1   | 3 |   |
| Vasculitis, auto-immune connective tissue disorder | 4 (1.7) | 4 (1.7) | 228 | 1 | c |
|                                                    |         |         | 1   | 3 |   |
| Leukaemia / other blood cancer                     | 3 (1.3) | 3 (1.3) | 230 | 0 | c |
|                                                    |         |         | 0   | 3 |   |
| Coagulation defect                                 | 2 (0.9) | 0 (0.0) | 231 | 0 | c |
|                                                    |         |         | 2   | 0 |   |

| Psychological / psychiatric chronic conditions |           |           |     |    |                  |
|------------------------------------------------|-----------|-----------|-----|----|------------------|
| Chronic anxiety disorder                       | 33 (14.2) | 32 (13.7) | 176 | 24 | 0.12 (0.00-0.30) |
|                                                |           |           | 25  | 8  |                  |
| Chronic sleeping disorder                      | 33 (14.2) | 7 (3.0)   | 197 | 3  | 0.16 (0.00-0.32) |
|                                                |           |           | 29  | 4  |                  |
| Tobacco use                                    | 22 (9.4)  | 25 (10.7) | 201 | 10 | 0.60 (0.46-0.74) |
|                                                |           |           | 7   | 15 |                  |
| Depressive disorder                            | 19 (8.2)  | 39 (16.7) | 188 | 26 | 0.38 (0.20-0.53) |
|                                                |           |           | 6   | 13 |                  |
| Chronic alcohol abuse                          | 9 (3.9)   | 15 (6.4)  | 215 | 9  | c                |
|                                                |           |           | 3   | 6  |                  |
| Memory disturbance / dementia                  | 9 (3.9)   | 1 (0.4)   | 224 | 0  | c                |
|                                                |           |           | 8   | 1  |                  |
| Drug / medication abuse                        | 8 (3.4)   | 8 (3.4)   | 223 | 2  | c                |
|                                                |           |           | 2   | 6  |                  |
| Post-traumatic stress disorder                 | 7 (3.0)   | 3 (1.3)   | 225 | 1  | c                |
|                                                |           |           | 5   | 2  |                  |
| Alimentary disorder                            | 7 (3.0)   | 3 (1.3)   | 225 | 1  | c                |
|                                                |           |           | 5   | 2  |                  |



|                       |         |         |     |   |   |
|-----------------------|---------|---------|-----|---|---|
| Bipolar syndrome      | 3 (1.3) | 4 (1.7) | 228 | 2 | c |
|                       |         |         | 1   | 2 |   |
| Personality disorder  | 2 (0.9) | 4 (1.7) | 229 | 2 | c |
|                       |         |         | 0   | 2 |   |
| Schizophrenia         | 1 (0.4) | 1 (0.4) | 232 | 0 |   |
|                       |         |         | 0   | 1 |   |
| Somatization disorder | 1 (0.4) | 2 (0.9) | 230 | 2 |   |
|                       |         |         | 1   | 0 |   |
| Other psychosis       | 0 (0.0) | 2 (0.9) | 231 | 2 |   |
|                       |         |         | 0   | 0 |   |

| Urological chronic conditions |          |          |     |   |                  |
|-------------------------------|----------|----------|-----|---|------------------|
| Benign prostatic hypertrophy  | 14 (6.0) | 15 (6.4) | 211 | 8 | 0.45 (0.12-0.60) |
|                               |          |          | 7   | 7 |                  |
| Urinary incontinence          | 9 (3.9)  | 1 (0.4)  | 223 | 1 | c                |
|                               |          |          | 9   | 0 |                  |
| Sexual dysfunction            | 8 (3.4)  | 1 (0.4)  | 225 | 0 | c                |
|                               |          |          | 7   | 1 |                  |
| Prostatic cancer              | 6 (2.6)  | 4 (1.7)  | 225 | 2 | c                |
|                               |          |          | 0   | 6 |                  |
| Chronic kidney failure        | 3 (1.3)  | 9 (3.9)  | 223 | 7 | c                |
|                               |          |          | 1   | 2 |                  |
| Urinary tract cancer          | 1 (0.4)  | 2 (0.9)  | 230 | 2 | c                |
|                               |          |          | 1   | 0 |                  |
| Male infertility              | 1 (0.4)  | 0 (0.0)  | 232 | 0 | c                |
|                               |          |          | 1   | 0 |                  |
| Chronic urinary calculus      | 0 (0.0)  | 1 (0.4)  | 232 | 1 | c                |
|                               |          |          | 0   | 0 |                  |

| Female genital chronic conditions                 |          |          |     |   |                  |
|---------------------------------------------------|----------|----------|-----|---|------------------|
| Breast cancer                                     | 11 (4.7) | 10 (4.3) | 220 | 2 | 0.75 (0.41-0.95) |
|                                                   |          |          | 3   | 8 |                  |
| Uterine fibroids                                  | 8 (3.4)  | 1 (0.4)  | 224 | 1 | c                |
|                                                   |          |          | 8   | 0 |                  |
| Cervical cancer                                   | 5 (2.1)  | 2 (0.9)  | 227 | 1 | c                |
|                                                   |          |          | 4   | 1 |                  |
| Menopause (with therapy for climacteric symptoms) | 4 (1.7)  | 5 (2.1)  | 226 | 3 | c                |
|                                                   |          |          | 2   | 2 |                  |
| Female infertility                                | 4 (1.7)  | 1 (0.4)  | 229 | 0 | c                |
|                                                   |          |          | 3   | 1 |                  |
| Other gynaecological cancer                       | 1 (0.4)  | 1 (0.4)  | 232 | 0 | c                |
|                                                   |          |          | 0   | 1 |                  |
| Prolapses                                         | 1 (0.4)  | 1 (0.4)  | 231 | 1 | c                |
|                                                   |          |          | 1   | 0 |                  |

| Other chronic conditions |          |           |     |    |   |
|--------------------------|----------|-----------|-----|----|---|
| Tuberculosis             | 4 (1.7)  | 0 (0.0)   | 229 | 0  |   |
|                          |          |           | 4   | 0  |   |
| Chronic pain syndrome    | 7 (3.0)  | 8 (3.4)   | 221 | 5  | c |
|                          |          |           | 4   | 3  |   |
| Other chronic condition  | 20 (8.6) | 41 (17.6) | 183 | 30 | c |
|                          |          |           | 9   | 11 |   |

The conditions highlighted in blue are reported in the article

a: each chronic condition is one of the 124 selected conditions on the previously developed list (Appendix 2)

The following conditions were not reported by the patients or their GPs: cardiovascular/aero digestive tract/musculoskeletal/ear or eye/brain/urological/other cancer, rectal incontinence, mental retardation, sickle cell anaemia, vitamin B12 anaemia, hemochromatosis, Parkinson disease, speech disorder, congenital respiratory/urological anomaly

b: **GP+/P+**: chronic condition reported by both the patient and GP; **GP+/P-**: chronic condition reported only by the GP; **GP-/P+**: chronic condition reported only by the patient; **GP-/P-**: chronic condition not reported by the patient or GP

c: We did not calculate kappa coefficient for the diseases with fewer than 10 patient self-reports.

**Supplementary Appendix 4.** Agreement between patients and GPs on health priorities  
(n=153 patient–GP pairs)

| <b>Chronic condition</b>                                | <b>Reported only in the patient list – n1</b> | <b>Reported in both the patient and GP list – n2</b> | <b>Reported only in the GP list – n3</b> | <b>Reported in at least one list – (n1+n2+n3)</b> |
|---------------------------------------------------------|-----------------------------------------------|------------------------------------------------------|------------------------------------------|---------------------------------------------------|
| 1. High blood pressure                                  | 4                                             | 37                                                   | 18                                       | 59                                                |
| 2. Osteoarthritis                                       | 18                                            | 7                                                    | 9                                        | 34                                                |
| 3. Chronic anxiety disorder                             | 11                                            | 9                                                    | 12                                       | 32                                                |
| 4. Depressive disorder                                  | 4                                             | 9                                                    | 17                                       | 30                                                |
| 5. Chronic low-back pain                                | 9                                             | 9                                                    | 5                                        | 23                                                |
| 6. Diabetes mellitus                                    | 3                                             | 14                                                   | 4                                        | 21                                                |
| 7. Overweight/obesity                                   | 9                                             | 5                                                    | 4                                        | 18                                                |
| 8. Tobacco use                                          | 4                                             | 3                                                    | 7                                        | 14                                                |
| 9. Chronic obstructive pulmonary disease                | 2                                             | 3                                                    | 9                                        | 14                                                |
| 10. Hiatus hernia/esophagitis/chronic gastritis         | 5                                             | 5                                                    | 3                                        | 13                                                |
| 11. Thyroid disorder                                    | 0                                             | 10                                                   | 3                                        | 13                                                |
| 12. (Allergic) chronic rhinitis/sinusitis               | 3                                             | 3                                                    | 4                                        | 10                                                |
| 13. Cardiovascular disease                              | 4                                             | 6                                                    | 1                                        | 11                                                |
| 14. Lipid disorder                                      | 3                                             | 2                                                    | 5                                        | 10                                                |
| 15. Migraine                                            | 4                                             | 3                                                    | 3                                        | 10                                                |
| 16. Benign prostatic hypertrophy                        | 5                                             | 2                                                    | 2                                        | 9                                                 |
| 17. Irritable bowel syndrome                            | 4                                             | 4                                                    | 1                                        | 9                                                 |
| 18. Sleep disorder                                      | 7                                             | 2                                                    | 0                                        | 9                                                 |
| 19. Asthma                                              | 3                                             | 3                                                    | 3                                        | 9                                                 |
| 20. Presbycusis/deafness                                | 5                                             | 2                                                    | 2                                        | 9                                                 |
| 21. Chronic alcohol abuse                               | 0                                             | 3                                                    | 5                                        | 8                                                 |
| 22. Peripheral neuritis/neuropathy                      | 0                                             | 4                                                    | 3                                        | 7                                                 |
| 23. Breast cancer                                       | 0                                             | 6                                                    | 0                                        | 6                                                 |
| 24. Eczema                                              | 2                                             | 3                                                    | 1                                        | 6                                                 |
| 25. Prostate cancer                                     | 1                                             | 3                                                    | 2                                        | 6                                                 |
| 26. Coronary artery disease                             | 0                                             | 2                                                    | 3                                        | 5                                                 |
| 27. Stroke/cerebrovascular accident                     | 1                                             | 3                                                    | 1                                        | 5                                                 |
| 28. Benign neoplasm                                     | 2                                             | 2                                                    | 0                                        | 4                                                 |
| 29. Cardiac arrhythmia                                  | 0                                             | 4                                                    | 1                                        | 5                                                 |
| 30. Chronic renal failure                               | 1                                             | 1                                                    | 2                                        | 4                                                 |
| 31. Liver disease                                       | 1                                             | 2                                                    | 1                                        | 4                                                 |
| 32. Medication/drug abuse                               | 1                                             | 0                                                    | 3                                        | 4                                                 |
| 33. Memory disturbance/dementia                         | 3                                             | 0                                                    | 1                                        | 4                                                 |
| 34. Psychological disorders (other psychiatric disease) | 2                                             | 1                                                    | 1                                        | 4                                                 |
| 35. Recurrent herpes infection                          | 4                                             | 0                                                    | 0                                        | 4                                                 |
| 36. Glaucoma                                            | 2                                             | 0                                                    | 1                                        | 3                                                 |
| 37. Heart valve disease                                 | 0                                             | 2                                                    | 1                                        | 3                                                 |
| 38. HIV infection / AIDS                                | 0                                             | 2                                                    | 1                                        | 3                                                 |
| 39. Inflammatory arthritis                              | 1                                             | 2                                                    | 0                                        | 3                                                 |
| 40. Osteoporosis                                        | 2                                             | 0                                                    | 2                                        | 4                                                 |
| 41. Scoliosis/acquired deformity of spine               | 1                                             | 0                                                    | 2                                        | 3                                                 |
| 42. Tendinitis (shoulder syndrome)                      | 2                                             | 1                                                    | 0                                        | 3                                                 |
| 43. Weakness / general tiredness                        | 3                                             | 0                                                    | 0                                        | 3                                                 |
| 44. Menopausal symptom                                  | 1                                             | 1                                                    | 1                                        | 3                                                 |
| 45. Acne                                                | 1                                             | 1                                                    | 0                                        | 2                                                 |
| 46. Endometriosis (other gynaecologic disease)          | 0                                             | 1                                                    | 1                                        | 2                                                 |
| 47. Psoriasis                                           | 1                                             | 1                                                    | 0                                        | 2                                                 |
| 48. Senility / feeling old                              | 1                                             | 0                                                    | 1                                        | 2                                                 |
| 49. Sleep apnea                                         | 1                                             | 1                                                    | 0                                        | 2                                                 |
| 50. Skin cancer                                         | 0                                             | 0                                                    | 2                                        | 2                                                 |
| 51. Incontinence urine                                  | 2                                             | 0                                                    | 0                                        | 2                                                 |
| 52. Somatization disorder                               | 0                                             | 0                                                    | 2                                        | 2                                                 |
| 53. Personality disorder                                | 0                                             | 1                                                    | 1                                        | 2                                                 |
| 54. Urinary tract cancer                                | 0                                             | 0                                                    | 1                                        | 1                                                 |
| 55. Pulmonary cancer                                    | 0                                             | 1                                                    | 0                                        | 1                                                 |

|                                                      |                   |                   |                   |                  |
|------------------------------------------------------|-------------------|-------------------|-------------------|------------------|
| 56. Anorexia nervosa/bulimia                         | 0                 | 0                 | 1                 | 1                |
| 57. Cough (other respiratory disease)                | 0                 | 1                 | 0                 | 1                |
| 58. Retinopathy                                      | 0                 | 0                 | 1                 | 1                |
| 59. Cervical cancer                                  | 0                 | 1                 | 0                 | 1                |
| 60. Digestive tract cancer                           | 0                 | 1                 | 0                 | 1                |
| 61. Inflammatory bowel disease                       | 0                 | 1                 | 0                 | 1                |
| 62. Leukemia/blood cancer                            | 0                 | 1                 | 0                 | 1                |
| 63. Dysuria (other urologic disease)                 | 0                 | 0                 | 1                 | 1                |
| 64. Epilepsy                                         | 1                 | 0                 | 0                 | 1                |
| 65. Foot/Hip symptom (other musculoskeletal disease) | 3                 | 0                 | 2                 | 5                |
| 66. Infertility                                      | 1                 | 0                 | 0                 | 1                |
| 67. Cataract                                         | 1                 | 0                 | 0                 | 1                |
| 68. Other dermatologic disease                       | 1                 | 0                 | 0                 | 1                |
| 69. Dermatitis seborrheic                            | 1                 | 0                 | 0                 | 1                |
| 70. Sexual dysfunction                               | 1                 | 0                 | 1                 | 2                |
| 71. Urinary calculus                                 | 0                 | 0                 | 1                 | 1                |
| 72. Current pulmonary embolism                       | 0                 | 0                 | 1                 | 1                |
| 73. Gout                                             | 0                 | 0                 | 1                 | 1                |
| 74. Chronic otitis                                   | 0                 | 0                 | 1                 | 1                |
| 75. Bipolar disorder                                 | 0                 | 0                 | 1                 | 1                |
| 76. Multiple sclerosis                               | 0                 | 1                 | 0                 | 1                |
| 77. Other digestive disease                          | 0                 | 0                 | 1                 | 1                |
| 78. Other neurologic disease                         | 1                 | 0                 | 0                 | 1                |
| 79. Autoimmune disorder/vasculitis                   | 0                 | 3                 | 0                 | 3                |
| 80. Chronic pain syndrome                            | 0                 | 1                 | 0                 | 1                |
| 81. Other                                            | 4                 | 0                 | 2                 | 6                |
| <b>Total – n (%)</b>                                 | <b>157 (30.2)</b> | <b>196 (37.8)</b> | <b>166 (32.0)</b> | <b>519 (100)</b> |

The conditions in bold are reported in the article (Figure 1).
